# Supplementary material
Source: HighWire-hosted journal article supplement (https://hw-f5-jim.highwire.org/content/69/2/338)
Supplement: inline-supplementary-material-1 [file inline-supplementary-material-1.pdf]

**SUPPLEMENTARY MATERIAL:****Prognostic value of estimated plasma volume in patients with chronic systolic heart failure**

Yuyao Lin, MD <sup>a, b</sup>, Yanbo Xue, MD <sup>a, b</sup>, Jing Liu, MD <sup>a, b</sup>, Xiqiang Wang, MD <sup>a, b</sup>, Linyan Wei, MD <sup>a, b</sup>, Jing Liu, MD <sup>a, b</sup>, Ling Bai, MD <sup>a, b, \*</sup>, Aiqun Ma, MD, PhD <sup>a, b, c, \*</sup>

<sup>a</sup> Department of Cardiovascular Medicine, First Affiliated Hospital of Xi'an Jiaotong University, Xi'an 710061, Shaanxi, People's Republic of China

<sup>b</sup> Key Laboratory of Molecular Cardiology; Key Laboratory of Environment and Genes Related to Diseases, Ministry of Education, No. 277 West Yanta Road, Xi'an, Shaanxi, China

<sup>c</sup> Key Laboratory of Environment and Genes Related to Diseases (Xi'an Jiaotong University), Ministry of Education, People's Republic of China

**\*Corresponding author:**

Aiqun Ma, MD, PhD, and Ling Bai, MD,

Department of Cardiovascular Medicine, First Affiliated Hospital of Xi'an Jiaotong University, No. 277 West Yanta Road, Xi'an, 710061, Shaanxi Province, the People's Republic of China

Telephone: +86-13709117138 and +86-13759958590.

E-mail: [aiqun.ma@xjtu.edu.cn](mailto:aiqun.ma@xjtu.edu.cn); [maaiqun1108@126.com](mailto:maaiqun1108@126.com) and [bailingb21@sina.com](mailto:bailingb21@sina.com).

**Table S1**

## Characteristics of the study population

| 35.6 months follow-up | All Patients   | First                 | Second                  | Third             | P Value |
|-----------------------|----------------|-----------------------|-------------------------|-------------------|---------|
|                       | N = 231        | <b>【ePVS ≤ 3.56</b>   | <b>【3.56 &lt; e PVS</b> | <b>【ePVS &gt;</b> |         |
|                       |                | <b>dl/g】 (n = 77)</b> | <b>≤ 4.35 dl/g】</b>     | <b>4.35dl/g】</b>  |         |
|                       |                |                       | (n = 77)                | (n = 77)          |         |
| Primary outcome       | 59.7%, n = 138 | 48.1%, n = 37         | 59.7%, n = 46           | 71.4%, n = 55     | 0.013   |
| All cause death       | 26.0%, n = 60  | 14.3%, n = 11         | 28.6%, n = 22           | 35.1%, n = 27     | 0.011   |
| Re-hospitalization    | 52.8%, n = 122 | 41.6%, n = 32         | 49.4%, n = 38           | 67.5%, n = 52     | 0.004   |

Abbreviations as in Table 1

**Table S2**

Correlation and collinearity between ePVS, logBNP and LVEF

|                  | logBNP                                   | ePVS                                     | LVEF, % |
|------------------|------------------------------------------|------------------------------------------|---------|
| logBNP           | -                                        | -                                        | -       |
| ePVS             | Pearson Correlation: 0.298<br>P < 0.001  | -                                        | -       |
| LVEF, %          | Pearson Correlation: -0.229<br>P < 0.001 | Pearson Correlation: -0.008<br>P = 0.903 | -       |
| LVEF ≤ 40%       | Pearson Correlation: -0.149<br>P = 0.063 | Pearson Correlation: -0.097<br>P = 0.230 | -       |
| 40% < LVEF < 50% | Pearson Correlation: -0.034<br>P = 0.771 | Pearson Correlation: 0.250<br>P = 0.031  | -       |

Abbreviations as in Table 1

**Table S3**

Association between baseline variables and primary outcome in Univariable Cox regression analysis

| Variables                            | Univariable HR (95% CI) | P Value |
|--------------------------------------|-------------------------|---------|
| Age, years                           | 1.012 (0.993-1.031)     | 0.209   |
| Male, n                              | 0.711 (0.509-0.995)     | 0.047   |
| BMI, kg/m <sup>2</sup>               | 0.981 (0.940-1.023)     | 0.371   |
| Hypertension, n                      | 1.037 (0.720-1.495)     | 0.844   |
| Diabetes, n                          | 0.864 (0.477-1.564)     | 0.628   |
| Coronary artery disease, n           | 1.301 (0.911-1.858)     | 0.148   |
| NYHA I/II/III/IV, %                  |                         | 0.006   |
| NYHA I                               | 0.354 (0.192-0.651)     | 0.001   |
| NYHA II                              | 0.927 (0.634-1.353)     | 0.693   |
| logBNP                               | 2.427 (1.639-3.593)     | < 0.001 |
| MAGGIC score                         | 1.056 (1.023-1.089)     | 0.001   |
| LVEF, %                              | 0.958 (0.938-0.979)     | < 0.001 |
| Systolic BP, mmHg                    | 0.992 (0.984-1.001)     | 0.079   |
| Albumin, g/dl                        | 1.005 (0.958-1.055)     | 0.830   |
| BUN, mg/dl                           | 0.976 (0.890-1.070)     | 0.604   |
| Sodium, mmol/l                       | 0.993 (0.934-1.055)     | 0.993   |
| Uric acid, mg/dl                     | 1.001 (0.999-1.002)     | 0.591   |
| Hemoglobin, g/dl                     | 0.978 (0.969-0.988)     | < 0.001 |
| Hematocrit, %                        | 0.936 (0.907-0.965)     | < 0.001 |
| ePVS                                 | 1.659 (1.358-2.027)     | < 0.001 |
| eGFR, ml/min per 1.73 m <sup>2</sup> | 0.993 (0.985-1.002)     | 0.111   |
| ACEI/ARB, %                          | 0.907 (0.592-1.391)     | 0.655   |
| Beta blocker, %                      | 1.200 (0.767-1.878)     | 0.425   |

---

|                           |                     |       |
|---------------------------|---------------------|-------|
| Aldosterone antagonist, % | 1.289 (0.858-1.938) | 0.221 |
| Diuretics, %              | 0.737 (0.523-1.038) | 0.081 |
| Digitalis, %              | 1.213 (0.817-1.802) | 0.338 |

---

Abbreviations: HR = Hazard Ratio; CI = confidence interval; other abbreviations as in Table 1

**Table S4**

Subgroups analyses: univariable cox regression analysis for primary outcome.

| Subgroups |                                       | univariable cox regression analysis for primary outcome |         |
|-----------|---------------------------------------|---------------------------------------------------------|---------|
|           |                                       | HR ratio (95%CI) for ePVS                               | P Value |
| LVEF      | LVEF ≤ 40%<br>(n=156, 112 events)     | 1.547<br>(1.234 – 1.940)                                | < 0.001 |
|           | 40% < LVEF < 50%<br>(n=75, 26 events) | 2.389<br>(1.510 – 3.779)                                | < 0.001 |

Abbreviations: HR = Hazard Ratio; CI = confidence interval; other abbreviations as in Table 1

**Table S5**

|                      | Model                        | HR ratio (95%CI) for ePVS | P Value |
|----------------------|------------------------------|---------------------------|---------|
| survival model       | ePVS                         | 1.646 (1.342-2.019)       | < 0.001 |
|                      | ePVS + age + gender          | 1.646 (1.342-2.019)       | < 0.001 |
|                      | ePVS + MAGGIC score + logBNP | 1.635 (1.326-2.017)       | < 0.001 |
| competing risk model | ePVS                         | 1.644 (1.297-2.084)       | < 0.001 |
|                      | ePVS + age + gender          | 1.742 (1.331-2.280)       | < 0.001 |
|                      | ePVS + MAGGIC score + logBNP | 1.584 (1.241-2.022)       | < 0.001 |

Competing risk regression analysis for HF re-hospitalization.

Abbreviations: HR = Hazard Ratio; CI = confidence interval; other abbreviations as in Table 1

**Table S6**

| <b>Term</b>   | <b>P Value</b> |
|---------------|----------------|
| ePVS          | 0.009          |
| anemia        | 0.265          |
| ePVS * anemia | 0.275          |

Test for interaction between ePVS and anemia on primary outcome.

Abbreviations: abbreviations as in Table 1
